# Supplementary material for: An Innovative, Prospective, Hybrid Cohort-Cluster Study Design to Characterize Dengue Virus Transmission in Multigenerational Households in Kamphaeng Phet, Thailand
Source: PubMed Central journal article supplement — Am J Epidemiol. 2020 Jan 23;189(7):648–59. doi: 10.1093/aje/kwaa008 (PMC7393304; doi:10.1093/aje/kwaa008), 2020-01-23
Supplement: web_material_kwaa008.pdf [file web_material_kwaa008.pdf]

## WEB MATERIAL

Article name: An Innovative Prospective Hybrid Cohort-Cluster Study Design to Characterize Dengue Virus Transmission in Multigenerational Households in Kamphaeng Phet, Thailand

Author names: Kathryn B. Anderson<sup>1,2\*</sup>, Darunee Buddhari<sup>2\*</sup>, Anon Srikiatkachorn<sup>3,4</sup>, Alongkot Ponlawat<sup>2</sup>, Gregory D. Gromowski<sup>5</sup>, Sapon Iamsirithaworn<sup>5</sup>, Alden L. Weg<sup>2</sup>, Damon W. Ellison<sup>2</sup>, Louis Macareo<sup>2</sup>, Derek A.T. Cummings<sup>7</sup>, In-Kyu Yoon<sup>8</sup>, Ananda Nisalak<sup>2</sup>, Stephen J. Thomas<sup>1</sup>, Stefan Fernandez<sup>2</sup>, Richard G. Jarman<sup>5</sup>, Alan L. Rothman<sup>3</sup>, and Timothy P. Endy<sup>1</sup>

Author affiliations: Institute for Global Health and Translational Science, State University of New York Upstate Medical University, Syracuse, NY, USA (Katie Anderson); Armed Forces Research Institute of Medical Sciences, Bangkok, Thailand (Katie Anderson and Darunee Buddhari); Institute for Immunology and Informatics, University of Rhode Island, Providence, RI, USA (Anon Srikiatkachorn); Faculty of Medicine, King Mongkut's Institute of Technology, Bangkok, Thailand (Anon Srikiatkachorn); Viral Diseases Branch, Walter Reed Army Institute of Research, Silver Spring, MD, USA (Gregory D. Gromowski); Thai Ministry of Public Health, Nonthaburi, Thailand (Sapon Iamsirithaworn); Armed Forces Research Institute of Medical Sciences, Bangkok, Thailand (Alden Weg, Damon Ellison, and Louis Macareo); University of Florida, Gainesville, FL, USA (Derek Cummings); Global Dengue and Aedes-Transmitted Diseases Consortium, Bethesda, MD, USA (In-Kyu Yoon); Armed Forces Research Institute of Medical Sciences, Bangkok, Thailand (Ananda Nisalak); Institute for Global Health and Translational Science, State University of New York Upstate Medical University, Syracuse, NY, USA (Stephen Thomas); Armed Forces Research Institute of Medical Sciences, Bangkok, Thailand (Stefan Fernandez); Walter Reed Army Institute of Research, Silver Spring, MD, USA (Richard Jarman); Institute for Immunology and Informatics, University of Rhode Island, Providence, RI, USA (Alan Rothman); Institute for Global Health and Translational Science and Department of Microbiology and Immunology, State University of New York Upstate Medical University, Syracuse, NY, USA (Timothy Endy).

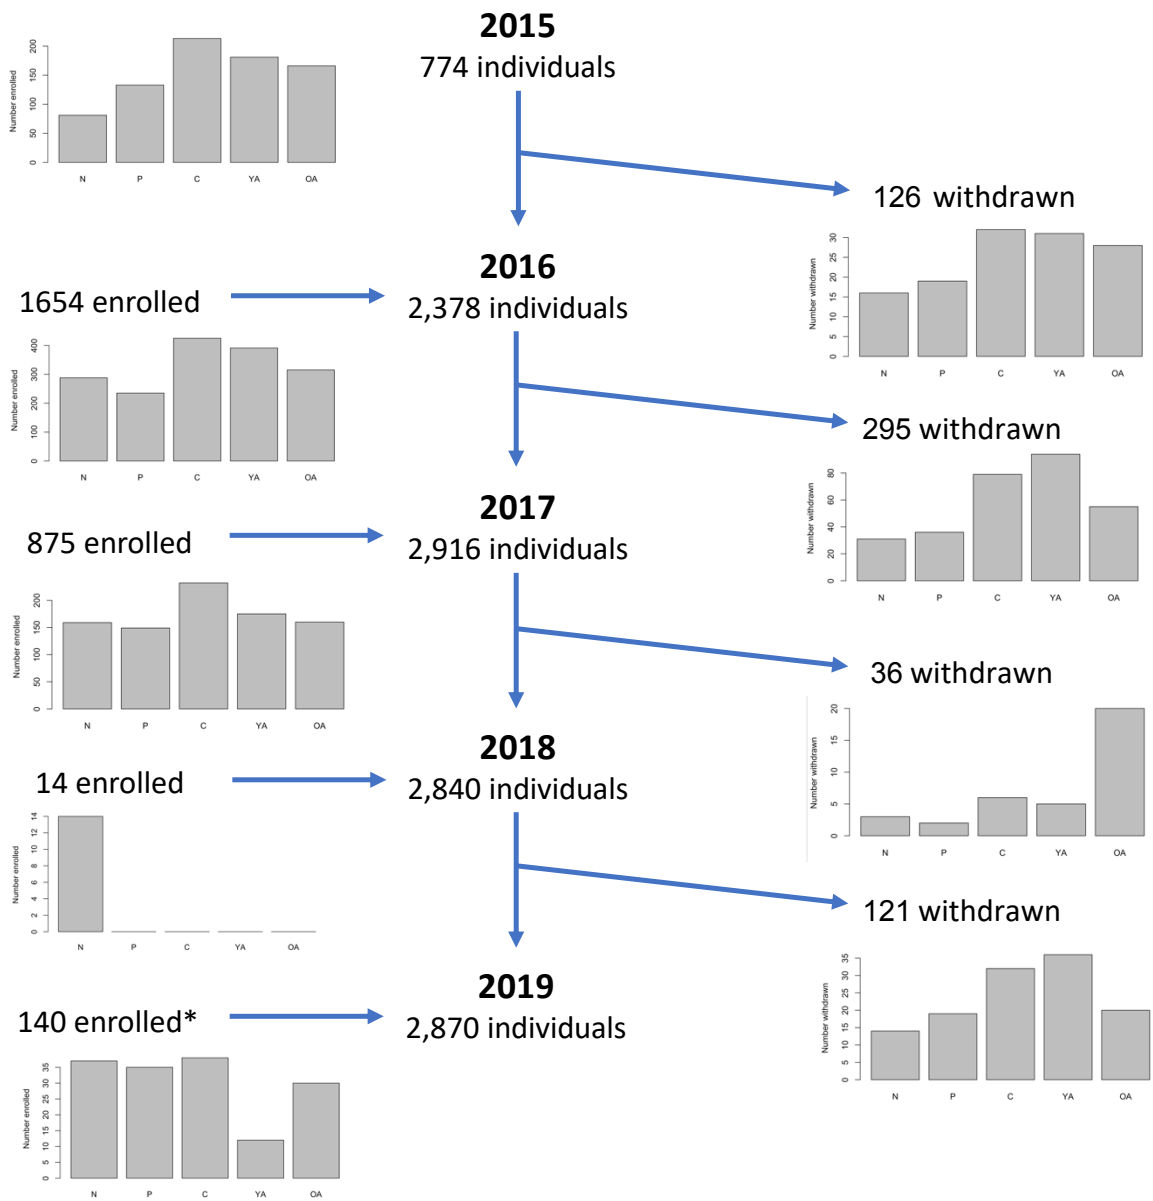

Web Figure 1: Study enrollment, retention, and withdrawals by year. For the inset bar plots, columns indicate, from left to right, the numbers of newborns, pregnant females, other children, other young adults (aged 18-49 years), and older adults (aged ≥50 years). Note that in 2018, enrollment was limited to 14 newborns born into already-enrolled families. Excludes 12 individuals enrolled in 2019 but withdrawn due to failure to collect cord blood.
